# Supplementary material for: BiP and Multiple DNAJ Molecular Chaperones in the Endoplasmic Reticulum Are Required for Efficient Simian Virus 40 Infection
Source: PubMed Central journal article supplement — mBio. 2011 Jun 14;2(3):e00101-11. doi: 10.1128/mBio.00101-11 (PMC3111607; doi:10.1128/mbio.00101-11), 2011-06-14

A

MMKFTVVA~~AA~~ LLLLGAVRAE EEDKKEDVGT VVGIDLGTTY SCVGVFKNGR VEIIANDQGN RITPSYVAFT  
PEGERLIGDA AKNOLTSNPE NTVFDAKRLI GRTWN~~DPSVQ~~ ODIKFLPFKV VEKTKPYIQ VDIGGGQTKT  
FAPEEISAMV LTKMKETAEA YLGKKVTHAV VTVPAYFNDA OROATKDAGT IAGLNVMRII NEPTAAAIAY  
GLDKREGEKN ILVFDLGGGT FDSLLTIDN GVFEVVATNG DTHLGGEDFD QRVMEHFIKL YKKKTGKDVR  
 KDNRAVQKLR REVEKAKRAL SSQHQARIEI ESFFEGEDFS ETLTRAKFEE LNMDLFRSTM KPVQKVLEDS  
DLKKS~~DIDEI~~ VLVGGSTRIP KIQQLVKEFF NGKEPSRGIN PDEAVAYGAA VQAGVLSGDQ DTGDLVLLDV  
 CPLTLGIETV GGVMTKLIPR NTVVPTKKSQ IFSTASDNQP TVTIKVYEGE RPLTKDNHLL GTFDLTGIPP  
APRGVPQIEV TFEIDVNGIL RVTAEDKGTG NKNKITITND QNRLTPEEIE RMVNDAEKFA EEDKKLKERI  
 DTRNELESYA YSLKNQIGDK EKLGGKLSSE DKETMEKAVE EKIEWLESHQ DADIEDFKAK KKELEEIVQP  
IISKLYGSGG PPPTGEEDTS EKDEL

B

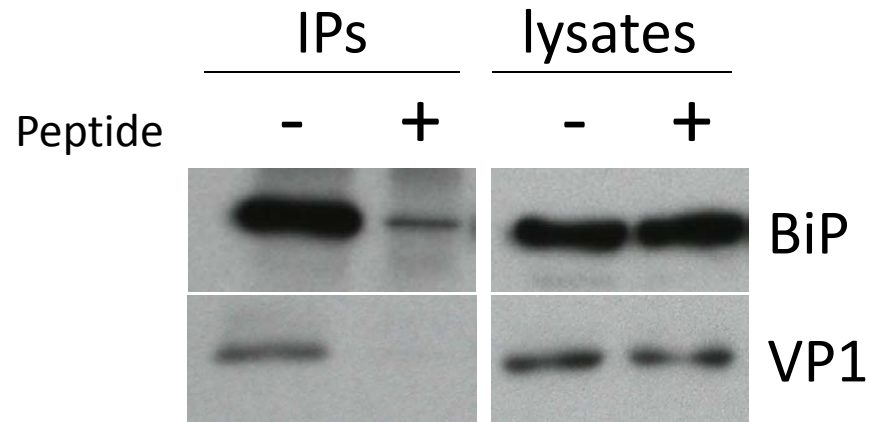

Supplement: mbo003111127sf07.pdf [file mbo003111127sf07.pdf]
