# Supplementary figures and images for: BiP and Multiple DNAJ Molecular Chaperones in the Endoplasmic Reticulum Are Required for Efficient Simian Virus 40 Infection
Source: PubMed Central journal article supplement — mBio. 2011 Jun 14;2(3):e00101-11. doi: 10.1128/mBio.00101-11 (PMC3111607; doi:10.1128/mbio.00101-11), 2011-06-14

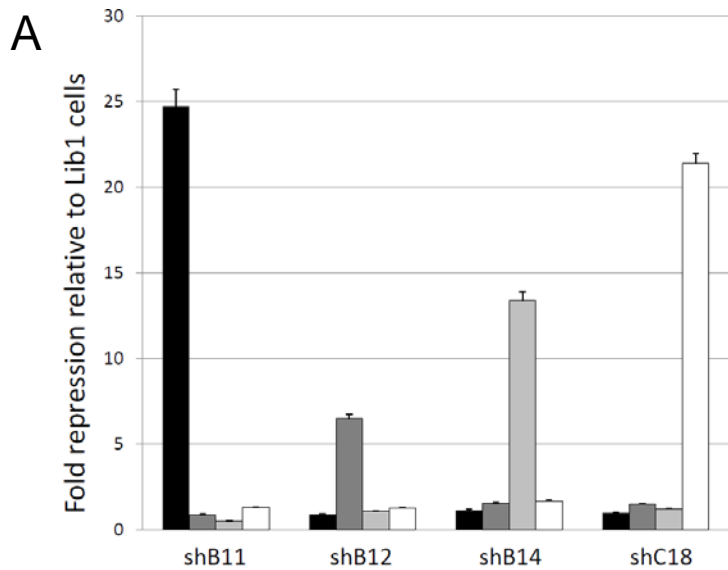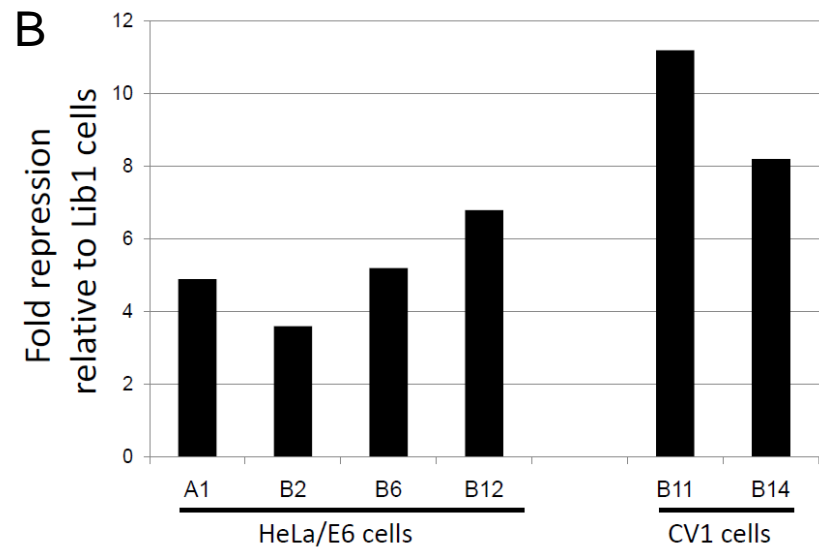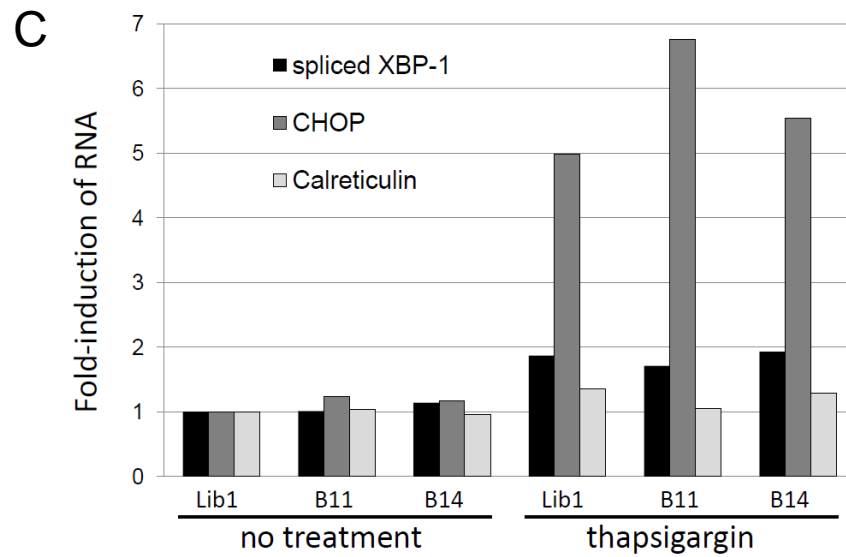

Supplement: mbo003111127sf01.pdf [file mbo003111127sf01.pdf]

A

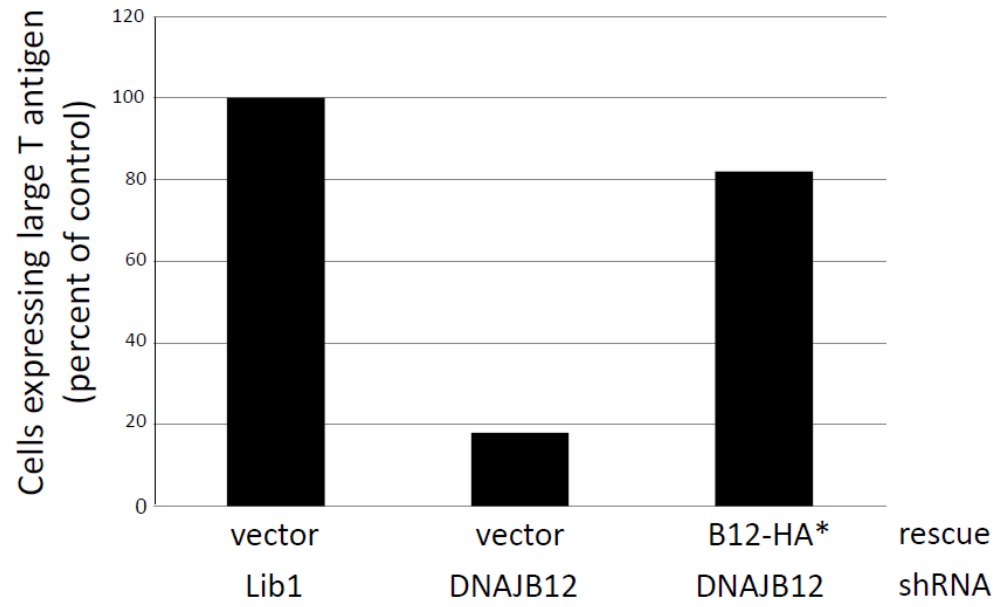

B

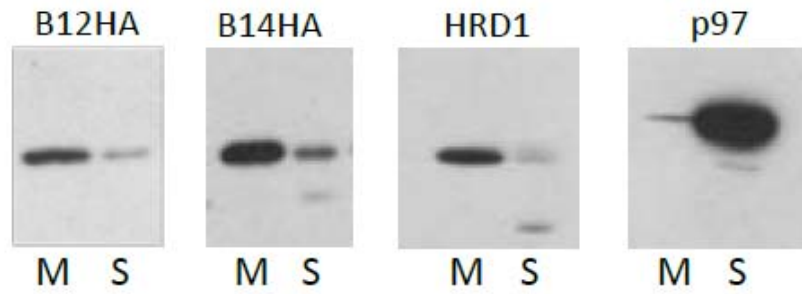

Supplement: mbo003111127sf02.pdf [file mbo003111127sf02.pdf]

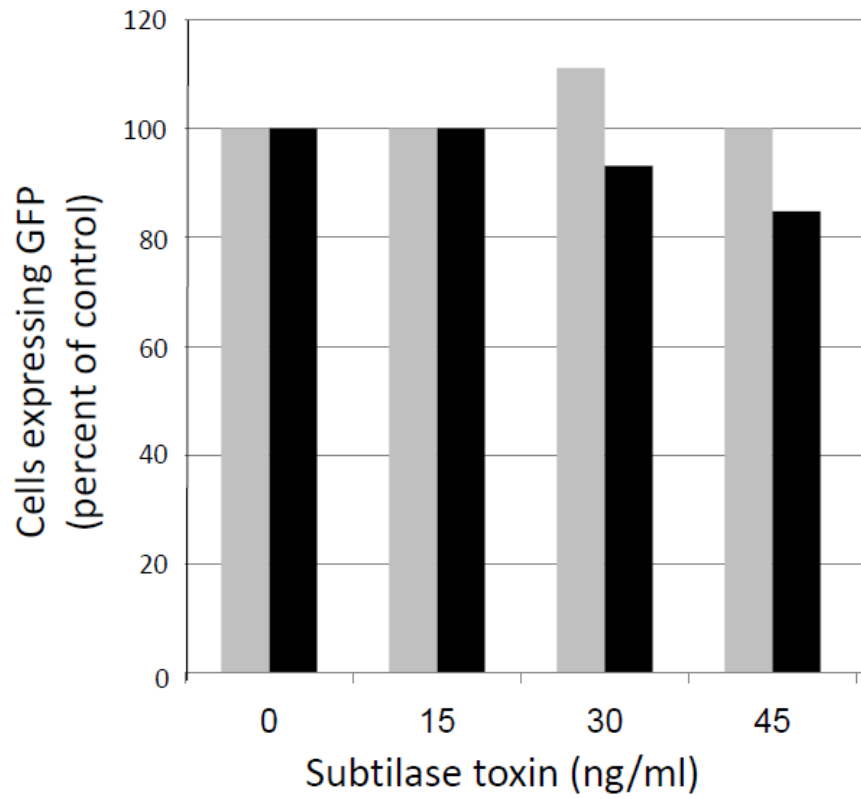

Supplement: mbo003111127sf03.pdf [file mbo003111127sf03.pdf]

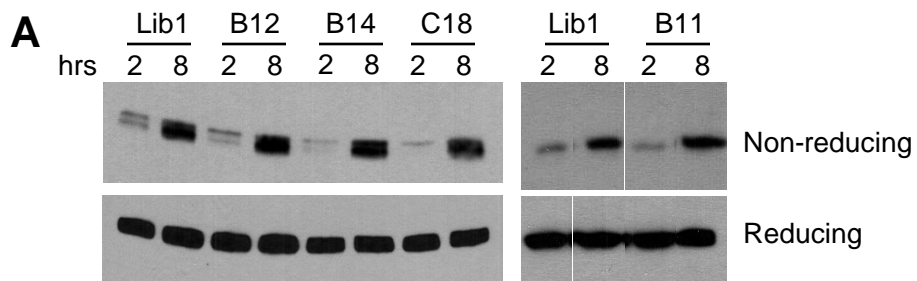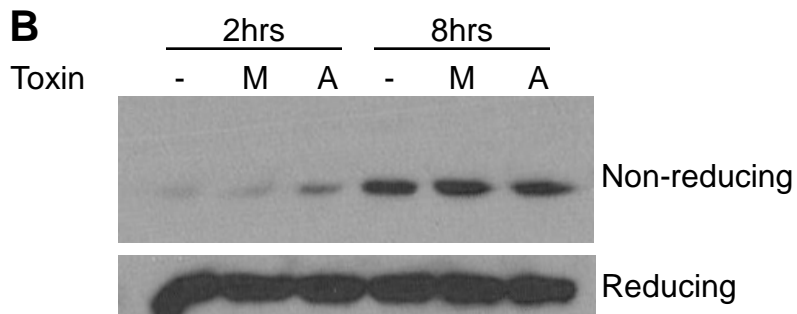

Supplement: mbo003111127sf04.pdf [file mbo003111127sf04.pdf]

**A**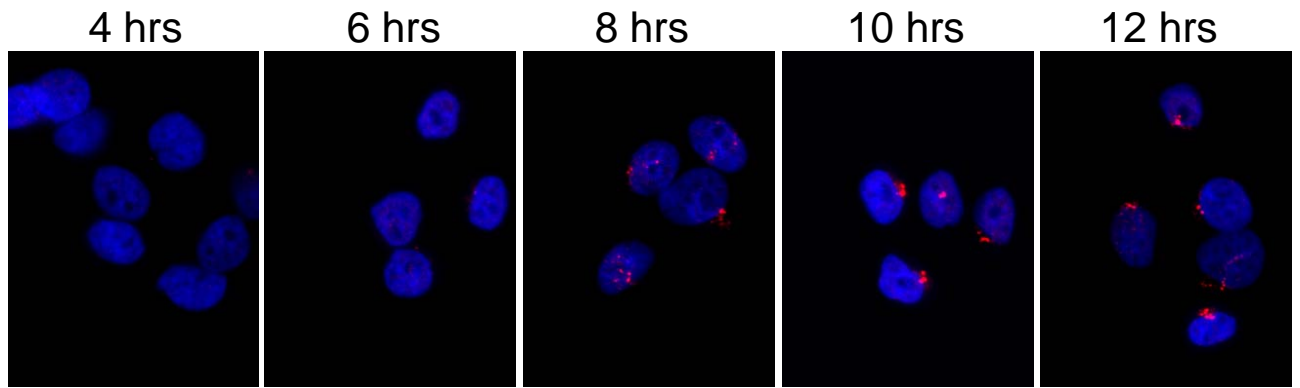**B**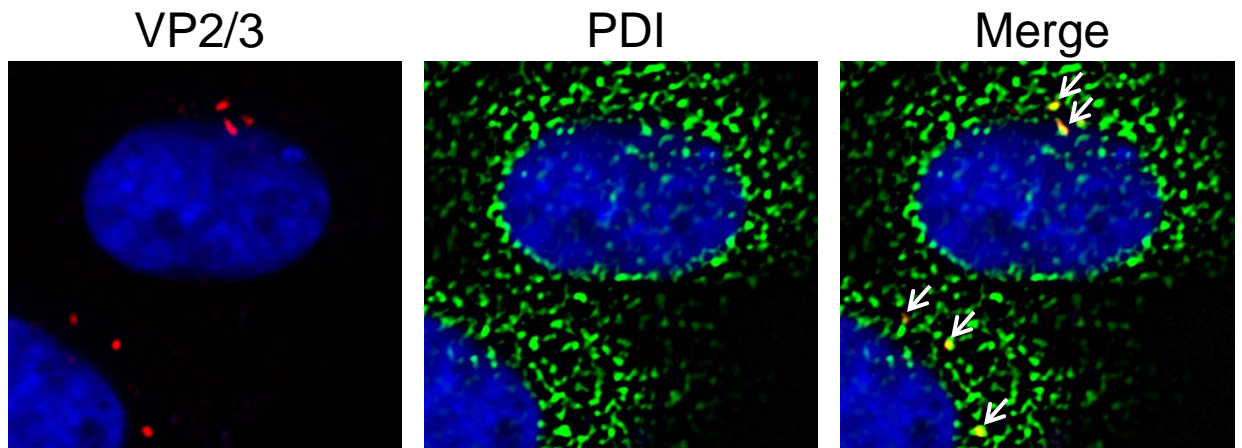**C**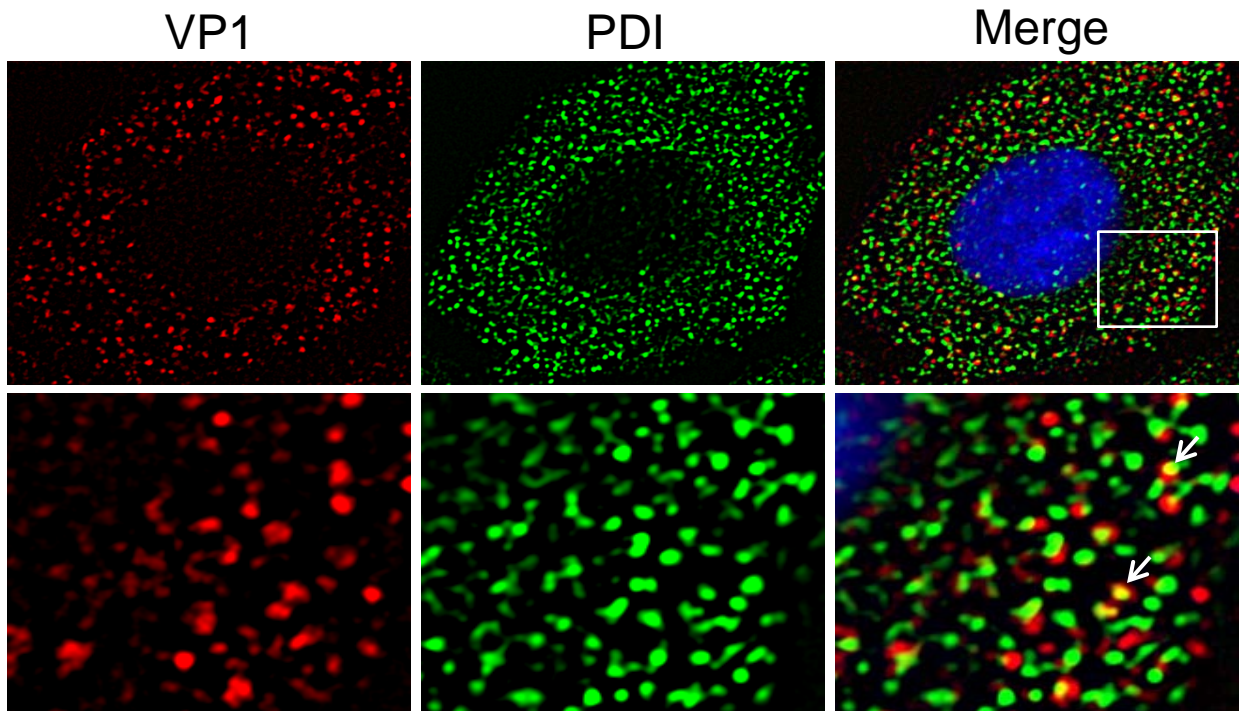

Supplement: mbo003111127sf05.pdf [file mbo003111127sf05.pdf]

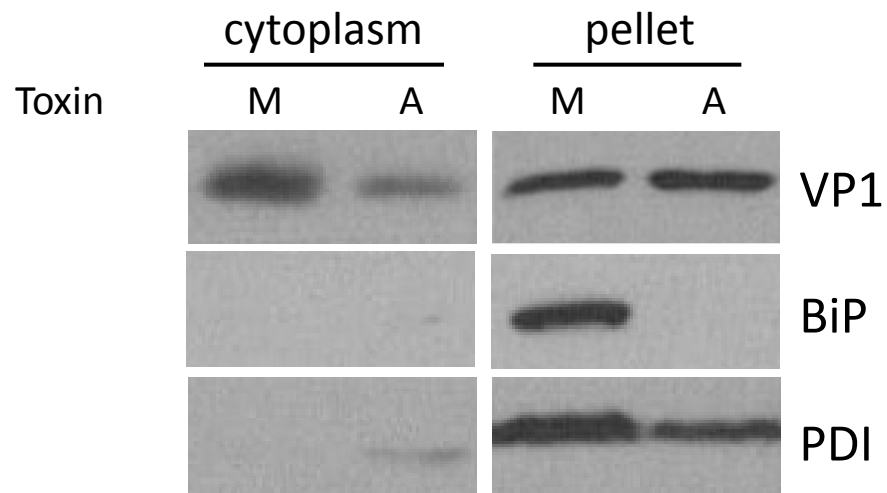

Supplement: mbo003111127sf06.pdf [file mbo003111127sf06.pdf]
